# Supplementary material for: Investigating the vertical extent of the 2023 summer Canadian wildfire impacts with satellite observations
Source: Copernicus journal article supplement (doi:10.5194/acp-24-11727-2024), 2024-10-21
Supplement: Supplementary file 1 [file acp-24-11727-2024-supplement.pdf]

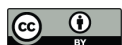

*Supplement of*

## **Investigating the vertical extent of the 2023 summer Canadian wildfire impacts with satellite observations**

**Selena Zhang et al.**

*Correspondence to:* Selena Zhang (selenaxz@mit.edu)

The copyright of individual parts of the supplement might differ from the article licence.

**Table S1: Number of monthly ACE-FTS occultations measurements taken between 40 and 70° N over the measurement period 2004 – 2022.**

| <b>Year</b> | <b>May</b> | <b>June</b> | <b>July</b> | <b>August</b> | <b>September</b> |
|-------------|------------|-------------|-------------|---------------|------------------|
| 2023        | 278        | 87          | 353         | 20            | 151              |
| 2022        | 293        | 95          | 269         | 21            | 164              |
| 2021        | 316        | 93          | 354         | 24            | 163              |
| 2020        | 308        | 89          | 302         | 25            | 160              |
| 2019        | 315        | 115         | 288         | 42            | 164              |
| 2018        | 321        | 117         | 326         | 41            | 171              |
| 2017        | 318        | 112         | 327         | 35            | 173              |
| 2016        | 301        | 109         | 330         | 28            | 160              |
| 2015        | 254        | 98          | 260         | 43            | 146              |
| 2014        | 256        | 81          | 236         | 38            | 151              |
| 2013        | 215        | 66          | 244         | 33            | 151              |
| 2012        | 284        | 92          | 252         | 32            | 152              |
| 2011        | 290        | 82          | 275         | 30            | 157              |
| 2010        | 296        | 82          | 274         | 23            | 154              |
| 2009        | 304        | 70          | 309         | 12            | 80               |
| 2008        | 274        | 61          | 280         | 1             | 150              |
| 2007        | 240        | 43          | 219         | 0             | 91               |
| 2006        | 255        | 50          | 226         | 0             | 103              |
| 2005        | 361        | 68          | 306         | 3             | 149              |
| 2004        | 35         | 31          | 193         | 10            | 100              |

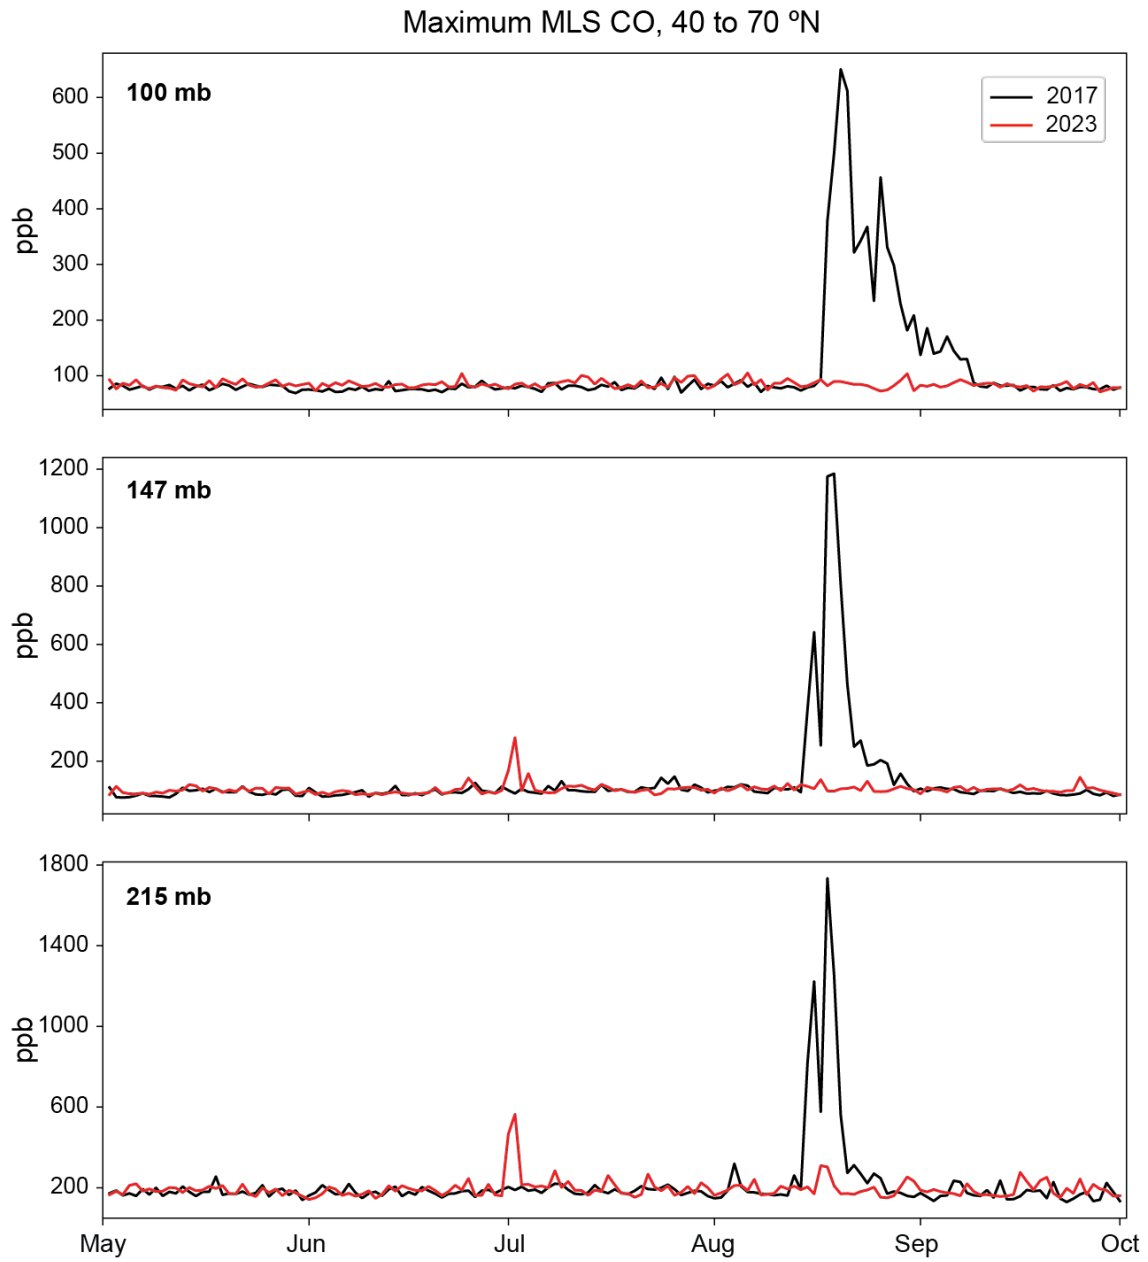

**Figure S1: Carbon monoxide data from MLS. The maximum CO at three different levels in the lower stratosphere are shown for 2017 (black) and 2023 (red). The stratospheric impact of the 2017 Pacific Northwest Event is evident, while the 2023 Canadian wildfires show a small perturbation in July only up to 147 mb.**

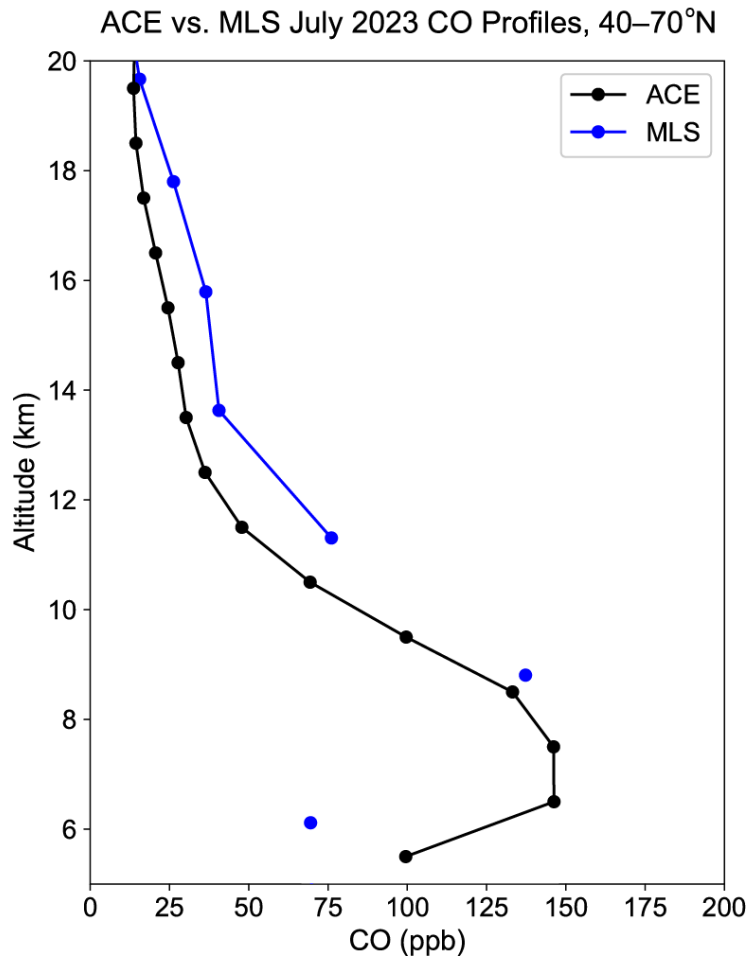

Figure S2: Comparison between MLS and ACE-FTS CO profiles. The average July 2023 values between 40 and 70 °N for MLS data are shown here in blue, and the average of every ACE occultation measurement taken between the same latitude range is shown in black. The MLS data is connected up to the lowest point of recommended use (215 hPa), and the remaining data is plotted as isolated points. The ACE data has higher vertical resolution and better signal lower in the atmosphere.

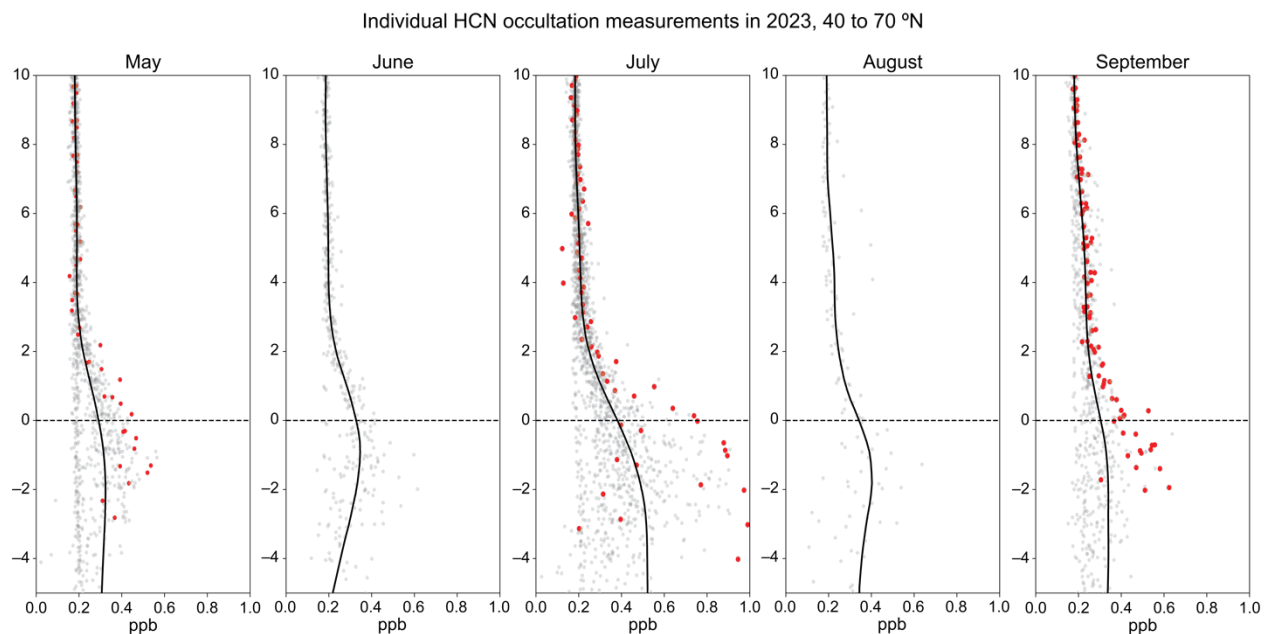

**Figure S3: Individual ACE-FTS HCN measurements for May through September 2023. Each occultation is plotted relative to its self-consistent tropopause height calculated from concurrent temperature profiles. The average of these tropopause-adjusted occultations for each month is shown in black. Occultations highlighted in red exhibit both elevated HCN and aerosol extinction in the stratosphere (Fig. 3, Fig. S5). Other occultations that exhibit enhanced HCN in the stratosphere do not exhibit similarly high aerosol extinction measurements, complicating interpretation of stratospheric entry, as shown in Figure S4.**

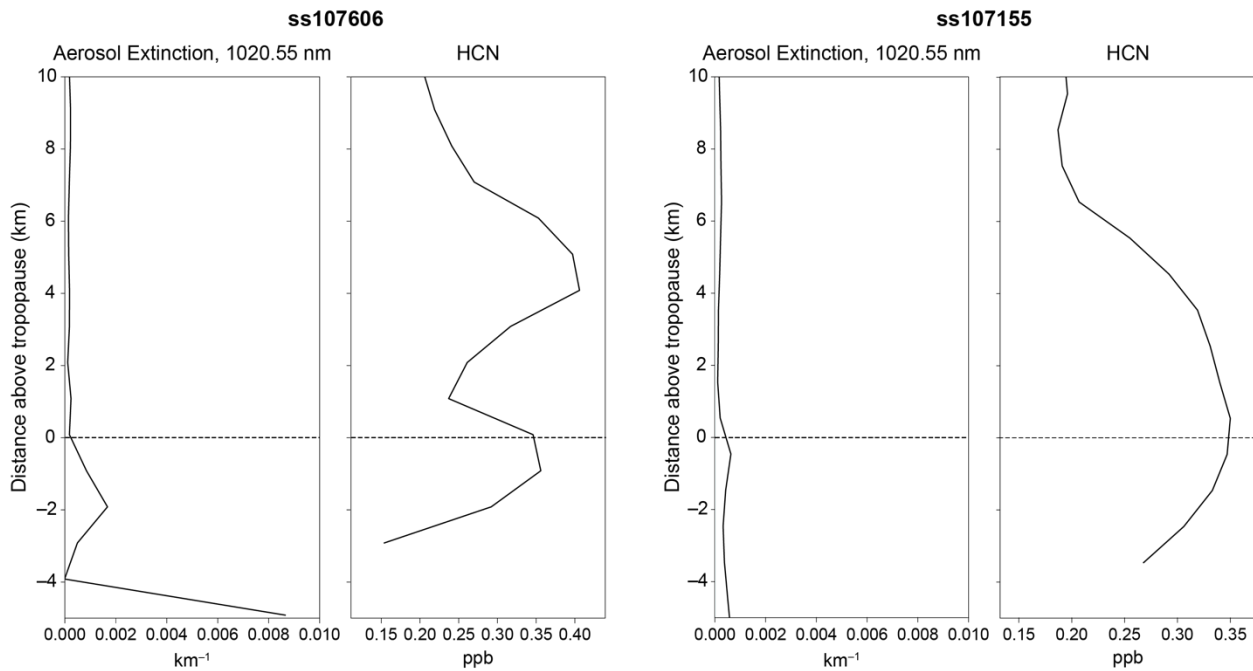

**Figure S4. Example occultations with enhanced HCN volume mixing ratios that do not exhibit similarly enhanced aerosol extinction. These measurements cannot be confidently attributed to fresh smoke since they do not measure aerosols in addition to gaseous biomass burning products. HCN has a long lifetime, and tropical observations indicate a seasonal source likely due to global biomass burning and upward transport into the stratosphere (Pumphrey et al., 2008). This source implies that enhanced HCN alone does not indicate a fresh biomass-burning plume but rather a more diffuse wildfire influence. Thus, the presence of simultaneous aerosol extinction and HCN VMR enhancement is important for identifying recent smoke influences.**

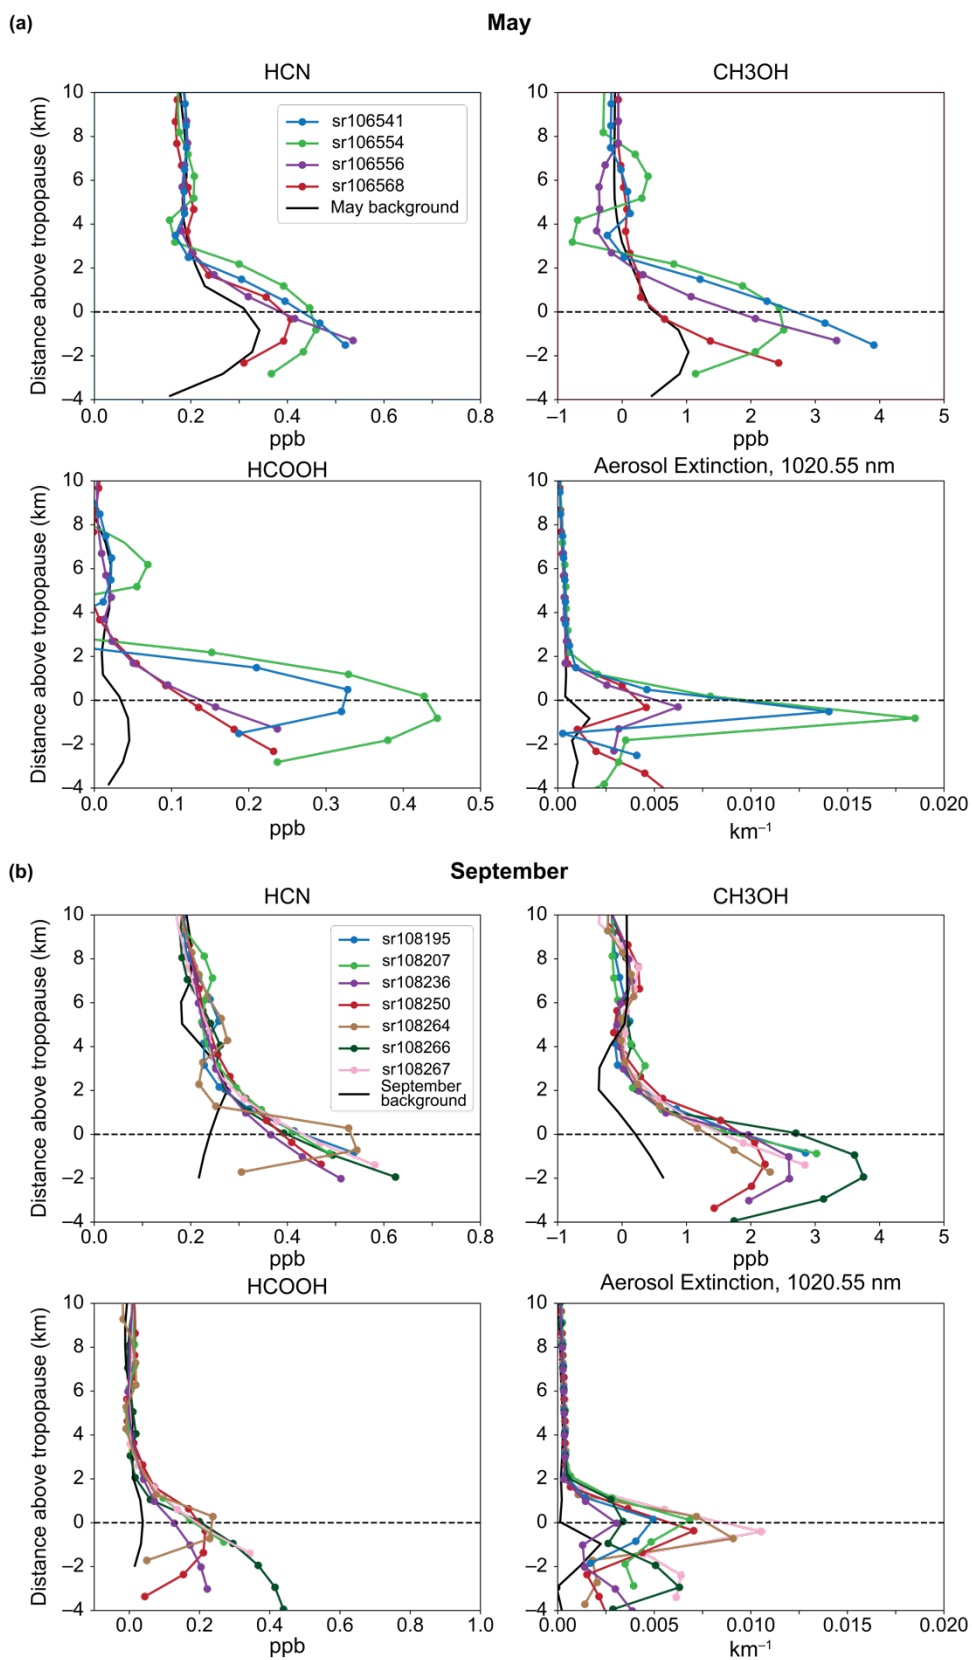

**Figure S5. Tropopause-relative profiles for (a) May and (b) September 2023 occultations that exhibit enhanced wildfire product VMRs and aerosol extinction in the lower stratosphere. Background profiles with no smoke from similar locations, sr106467 (May) and sr108161 (September), are plotted for reference.**

NOAA HYSPLIT Back Trajectory (GDAS ensemble)  
 Initialized July 15, 2023 01:00 UTC, 68.37 °N, 10.81 °W (ss107346)

NOAA HYSPLIT Back Trajectory (GDAS ensemble)  
 Initialized July 30, 2023 04:00 UTC, 49.14 °N, 132.10 °W (ss107570)

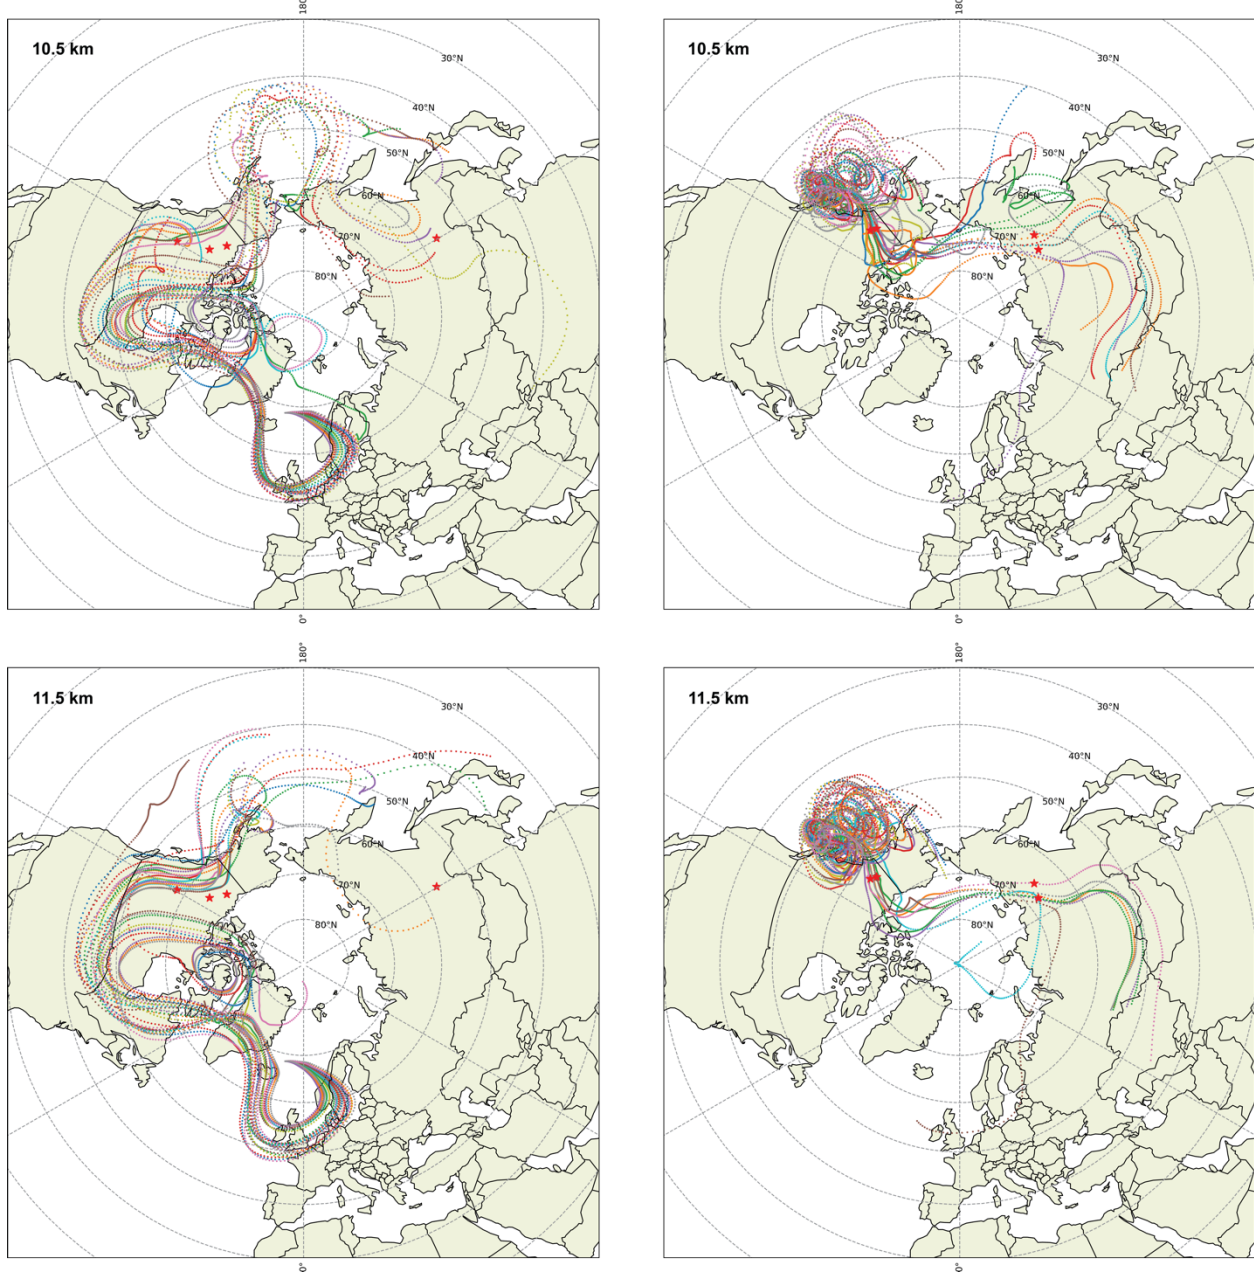

**Figure S6: NOAA HYSPLIT back-trajectory ensembles run on GDAS 1-degree meteorology. All of the trajectories were initialized from ACE measurement locations and times and run backwards for 315 hours. Launch altitudes were varied to cover a range of where elevated VMRs and aerosol extinction values were measured. Red stars indicate locations of reported pyroCbs up to two weeks before the ACE measurement time. Trajectories from the only two occultations that pass near reported pyroCbs are shown here.**

A trajectory initialized from ss107346 (left panel) at 11.5 km reaches 57.95 °N, -120.7 °W at 18:00 UTC on July 5<sup>th</sup> 2023, near a reported pyroCb at 58.2 °N, 120.46 °W around 01:00 UTC on July 6<sup>th</sup> 2023. Trajectories initialized from ss107570 (right panel) at 11.5 km pass near two reported pyroCbs: 1) trajectory point 67.6° N, 130.2 °W at 20:00 UTC July 21<sup>st</sup> near a reported pyroCb at 67.4 °N, 130.1 °W around 23:40 UTC July 22<sup>nd</sup> and 2) trajectory point 62.7 °N, 133.7 °W at 22:00 UTC July 24<sup>th</sup> near a reported pyroCb at 63 °N, 133.8 °W around 02:40 UTC July 24<sup>th</sup>. These times and locations do not exactly coincide, but suggest the possible influence of fires in the region on measured atmospheric composition.



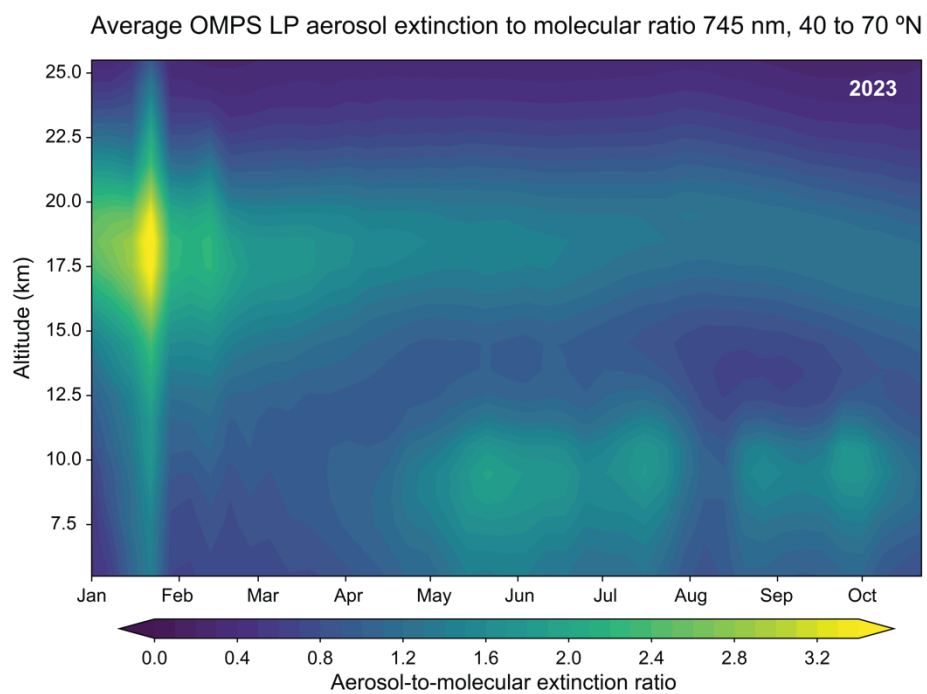

**Figure S7. OMPS aerosol-to-molecular extinction ratio averaged between 40 and 70 °N. The evolution of vertical aerosol distribution over 2023 shows two clear features: a large aerosol burden around 18 km present from the start of the year (not wildfires) and an increase in upper tropospheric aerosol burden starting in May 2023 (wildfires).**

## References

Pumphrey, H. C., Boone, C., Walker, K. A., Bernath, P., and Livesey, N. J.: Tropical tape recorder observed in HCN, *Geophys. Res. Lett.*, 35, L05801, <https://doi.org/10.1029/2007GL032137>, 2008.
